# Supplementary material for: Evolution of SARS-CoV-2 Shedding in Exhaled Breath Aerosols
Source: bioRxiv or medRxiv preprint supplement (doi:10.1101/2022.07.27.22278121), 2022-08-01
Supplement: Supplementary file [file media-1.pdf]

**Extended Data Table 1.** Demographics for SARS-CoV-2 cases enrolled June 6, 2020 – March 11, 2022

|                                                       |                                                               | Enrolled<br>September 2021<br>- March 2022 | Enrolled<br>June 2020 -<br>April 2021 <sup>a</sup> | All<br>participants |
|-------------------------------------------------------|---------------------------------------------------------------|--------------------------------------------|----------------------------------------------------|---------------------|
| <b>Number of participants</b>                         |                                                               | 32                                         | 61                                                 | 93                  |
| <b>Number of exhaled breath samples</b>               |                                                               | 50                                         | 100                                                | 150                 |
| <b>Variant, N (%)</b>                                 | <b>Ancestral strains and other</b>                            | 0 (0)                                      | 57 (93)                                            | 57 (61)             |
|                                                       | <b>Alpha</b>                                                  | 0 (0)                                      | 4 (7)                                              | 4 (4)               |
|                                                       | <b>Delta</b>                                                  | 3 (9)                                      | 0 (0)                                              | 3 (3)               |
|                                                       | <b>Omicron BA.1</b>                                           | 8 (25)                                     | 0 (0)                                              | 8 (9)               |
|                                                       | <b>Omicron BA.1.1</b>                                         | 14 (44)                                    | 0 (0)                                              | 14 (15)             |
|                                                       | <b>Omicron BA.2</b>                                           | 7 (22)                                     | 0 (0)                                              | 7 (8)               |
| <b>Female, N (%)</b>                                  |                                                               | 13 (41)                                    | 23 (38)                                            | 36 (39)             |
| <b>Age, mean ± SD</b>                                 |                                                               | 27.2 ± 15.3                                | 23.6 ± 9                                           | 24.8 ± 11.6         |
| <b>Age group, N (%)</b>                               | <b>&lt;18</b>                                                 | 3 (9)                                      | 1 (2)                                              | 4 (4)               |
|                                                       | <b>18-45</b>                                                  | 24 (75)                                    | 57 (93)                                            | 81 (87)             |
|                                                       | <b>&gt;45</b>                                                 | 5 (16)                                     | 3 (5)                                              | 8 (9)               |
| <b>Race/Ethnicity, N(%)</b>                           | <b>White</b>                                                  | 19 (59)                                    | 48 (79)                                            | 67 (72)             |
|                                                       | <b>Black/African American</b>                                 | 5 (16)                                     | 7 (12)                                             | 12 (13)             |
|                                                       | <b>Hispanic</b>                                               | 5 (16)                                     | 8 (13)                                             | 13 (14)             |
| <b>BMI, mean ± SD</b>                                 |                                                               | 24.7 ± 5.4                                 | 25.2 ± 4.5                                         | 25 ± 4.8            |
| <b>Chronic respiratory illness, N (%)<sup>b</sup></b> |                                                               | 6 (19)                                     | 13 (21)                                            | 19 (20)             |
| <b>Vaccination status, N (%)<sup>c</sup></b>          | <b>Boosted</b>                                                | 20 (63)                                    | 0 (0)                                              | 20 (22)             |
|                                                       | <b>Fully vaccinated, not boosted</b>                          | 12 (37)                                    | 0 (0)                                              | 12 (13)             |
|                                                       | <b>Partially vaccinated</b>                                   | 0 (0)                                      | 3 (5)                                              | 3 (3)               |
|                                                       | <b>Not vaccinated</b>                                         | 0 (0)                                      | 58 (95)                                            | 58 (62)             |
| <b>Anti-spike RBD antibody (IgG), N (%)</b>           |                                                               | 32 (100)                                   | 6 (10) <sup>d</sup>                                | 38 (41)             |
| <b>Anti-nucleocapsid antibody (IgG), N (%)</b>        |                                                               | 5 (16)                                     | N/A <sup>e</sup>                                   | 5 (5)               |
| <b>Ever symptomatic, N (%)</b>                        |                                                               | 32 (100)                                   | 58 (95)                                            | 90 (97)             |
| <b>Symptomatic participants</b>                       | <b>Days post symptom onset<sup>f</sup>, mean ± SD (range)</b> | 3 ± 2 (1-7)                                | 5 ± 3 (0-13)                                       | 4 ± 2 (0-13)        |
|                                                       | <b>Coughs per 30 min, mean ± SD (range)</b>                   | 8 ± 15 (0-69)                              | 1 ± 4 (0-24)                                       | 4 ± 10 (0-69)       |
|                                                       | <b>Median upper respiratory symptoms<sup>g</sup> (IQR)</b>    | 3.5 (2 - 6)                                | 2 (1 - 3.8)                                        | 3 (1 - 4)           |
|                                                       | <b>Median lower respiratory symptoms (IQR)</b>                | 1 (0.2 - 2)                                | 0 (0 - 1.8)                                        | 1 (0 - 2)           |
|                                                       | <b>Median systemic symptoms (IQR)</b>                         | 2 (1 - 6)                                  | 1 (0 - 3)                                          | 2 (0 - 4)           |
|                                                       | <b>Median gastrointestinal symptoms (IQR)</b>                 | 1 (0 - 2)                                  | 0 (0 - 1)                                          | 0 (0 - 1)           |
|                                                       | <b>Temperature (C), mean ± SD</b>                             | 37 ± 0.3                                   | 37.2 ± 0.3                                         | 37.1 ± 0.3          |
|                                                       | <b>Oxygen saturation (SpO2), mean ± SD</b>                    | 97.9 ± 0.8                                 | 97.8 ± 1                                           | 97.8 ± 1            |

BMI = Body mass index; RBD = Receptor Binding Domain; IgG = Immunoglobulin class G; IQR = Interquartile range

- a. Includes previously reported cases<sup>2</sup>
- b. Chronic respiratory illness = volunteers with any chronic obstructive pulmonary disease, asthma, other lung diseases
- c. Boosted = received one vaccine booster dose  $\geq 8$  days prior to study enrollment; Fully vaccinated, not boosted = received only two doses of BNT162B2, mRNA-1273, or NVX-CoV2373, or one dose of Ad26.COV2  $\geq 14$  days prior to study enrollment; Partially vaccinated = received only one dose of BNT162B2 or mRNA-1273
- d. Serologic status data for four participants were missing due to a lack of blood samples
- e. Anti-nucleocapsid antibodies were not measured for these participants
- f. Days since symptom onset at the time of each sample collection visit
- g. Symptoms at the time of each sample collection visit. Sixteen symptoms were rated from 0 to 3 with a maximum possible composite score of 15 for upper respiratory, 9 for lower respiratory, 12 for systemic symptoms and 12 for gastrointestinal symptoms

**Extended Data Table 2.** Vaccine and booster types received by Delta and Omicron cases, September 14, 2021 – March 11, 2022.

|                     |             | <b>Booster type</b> |           |             |             |
|---------------------|-------------|---------------------|-----------|-------------|-------------|
|                     |             | BNT162b2            | mRNA-1273 | NVX-CoV2373 | Not boosted |
| <b>Vaccine Type</b> | BNT162b2    | 9                   | 5         | 0           | 10          |
|                     | mRNA-1273   | 1                   | 3         | 0           | 0           |
|                     | Ad26.COVS.2 | 1                   | 1         | 0           | 1           |
|                     | NVX-CoV2373 | 0                   | 0         | 0           | 1           |

**Extended Data Table 3.** SARS-CoV-2 in respiratory and fomite samples from Delta and Omicron participants, September 14, 2021 – March 11, 2022

| Sample type                  | Participants with $\geq 1$ PCR positive sample, n/N (%) <sup>a</sup> | Participants with $\geq 1$ culture positive sample, n/N (%) <sup>b</sup> | PCR Positive Samples, n/N (%) <sup>c</sup> | RNA copies per sample                                          |                      |
|------------------------------|----------------------------------------------------------------------|--------------------------------------------------------------------------|--------------------------------------------|----------------------------------------------------------------|----------------------|
|                              |                                                                      |                                                                          |                                            | GM (95% CI) <sup>d</sup>                                       | Maximum <sup>e</sup> |
| Saliva                       | 27/32 (84)                                                           | 8/31 (26)                                                                | 42/50 (84)                                 | $6.6 \times 10^4$<br>( $9.5 \times 10^3$ , $4.6 \times 10^5$ ) | $8.8 \times 10^8$    |
| Mid-turbinate Swab           | 32/32 (100)                                                          | 26/31 (84)                                                               | 50/50 (100)                                | $3.6 \times 10^7$<br>( $1.3 \times 10^7$ , $9.9 \times 10^7$ ) | $4.0 \times 10^9$    |
| Fomite (mobile phone screen) | 14/30 (47)                                                           | 0/26 (0)                                                                 | 20/47 (43)                                 | 16<br>(2.1, 130)                                               | $4.5 \times 10^5$    |
| Coarse EBA <sup>f</sup>      | 16/32 (50)                                                           | 1/31 (3)                                                                 | 23/50 (46)                                 | 29<br>(7.1, 120)                                               | $1.8 \times 10^5$    |
| Fine EBA                     | 20/32 (62)                                                           | 3/31 (10)                                                                | 28/50 (56)                                 | 150<br>(35, 600)                                               | $1.8 \times 10^7$    |
| Total EBA (fine + coarse)    | 21/32 (66)                                                           | 4/31 (13)                                                                | 51/100 (51)                                | 200<br>(52, 790)                                               | $1.8 \times 10^7$    |

- a. Number (n) of participants (N) with at least one sample  $\geq$  the limit of detection (LOD, 62 copies/mL for saliva and 75 copies/sample for other sample types)
- b. Number (n) of participants with samples subjected to culture (N) with at least one sample giving a positive culture for SARS-CoV-2
- c. Number (n) of samples (N)  $\geq$  LOD, with at least 1 replicate with confirmed amplification after inspection and quality control
- d. GM = geometric mean. The GMs were computed by controlling for random effects of subject and sample nested within subjects and for censoring by the limit of detection using a linear mixed-effects model for censored responses (R package “lme4”<sup>24</sup>)
- e. The largest quantity of RNA copies detected based on the mean of replicate qRT-PCR aliquots
- f. EBA = Exhaled breath aerosol. Each EBA sample was collected using a Gesundheit-II machine for 30 minutes

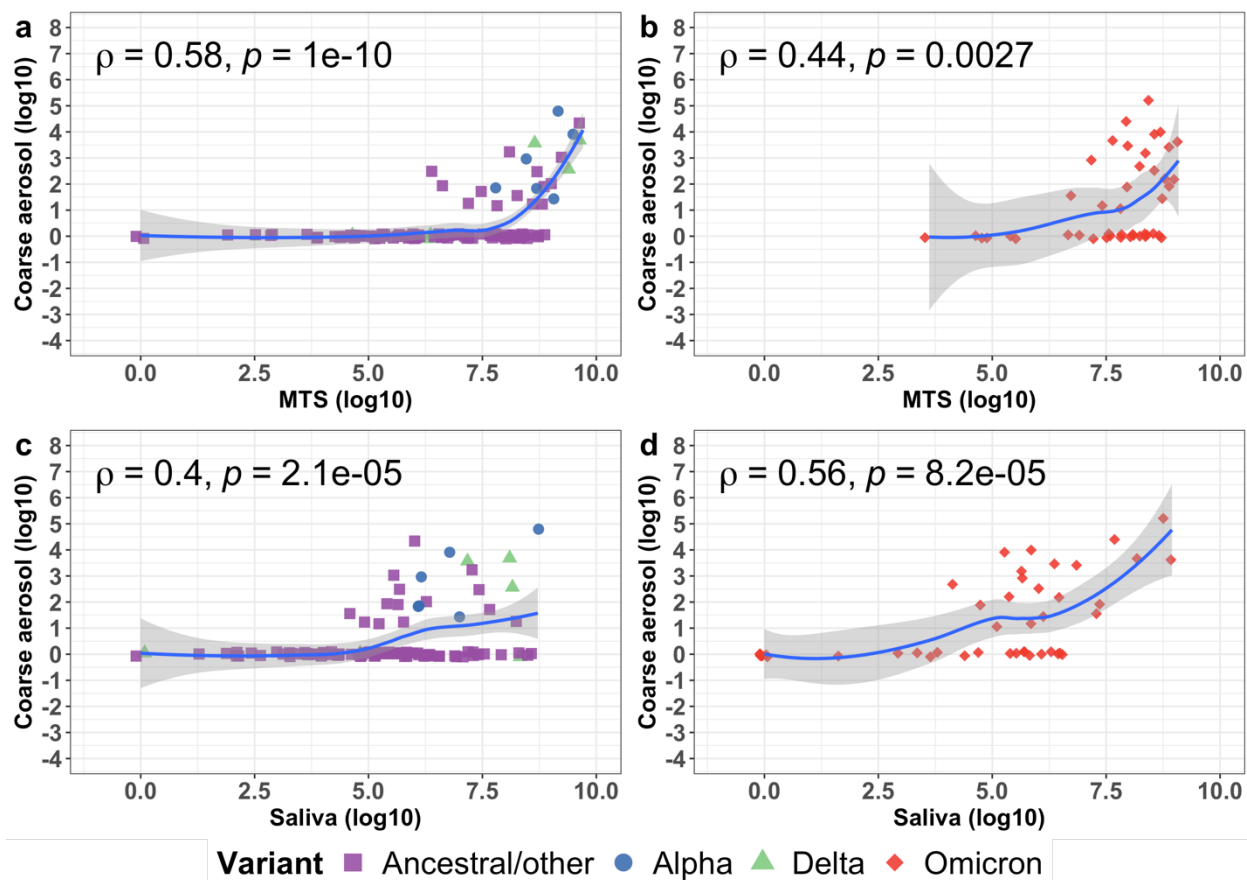

**Extended Data Figure 1. Correlation between SARS-CoV-2 RNA copies in coarse exhaled breath aerosol (>5  $\mu\text{m}$  in diameter) and mid-turbinate swab (MTS) samples as well as saliva, June 6, 2020 – March 11, 2022.** The locally weighted smoothing (LOESS) curves demonstrate the correlation of the RNA copies on the log 10 scale between *coarse* EBA and MTS (**a, b**) as well as *coarse* EBA and saliva (**c, d**). The shaded areas represent the 95% confidence interval of the smooth curves. Each point represents samples collected from an individual on a specific day. Rho ( $\rho$ ) is the Spearman correlation coefficient. **a** and **c** depict the correlations among pre-Omicron (ancestral/other, Alpha, and Delta) infections. **b** and **d** depict the correlations among Omicron (including BA.1, BA.1.1, BA.2) infections. *Ancestral/other* means SARS-CoV-2 ancestral strains and other variants not associated with increased transmissibility.

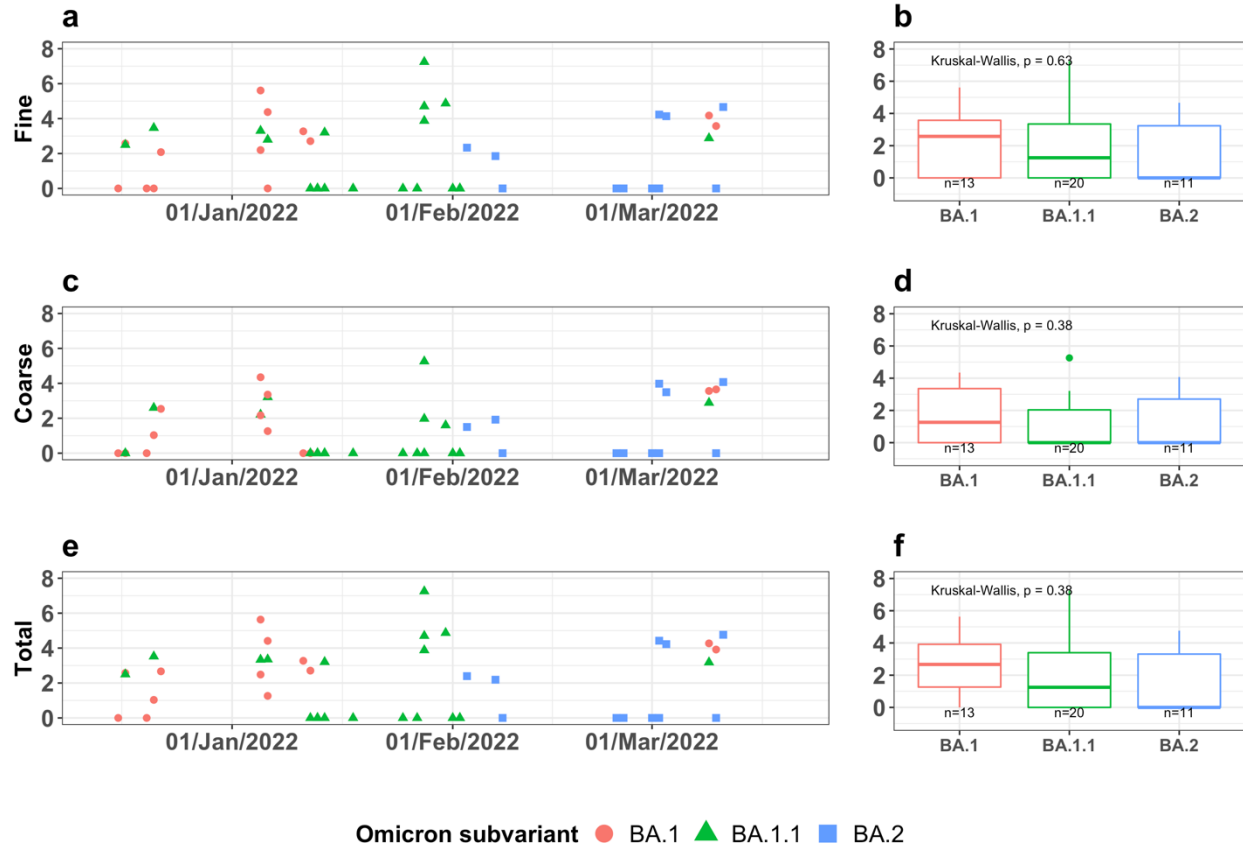

**Extended Data Figure 2. Viral RNA copies (log<sub>10</sub> scale) in fine and coarse exhaled breath aerosol (EBA) samples for SARS-CoV-2 Omicron subvariants over time, December 2021 – March 2022.**

**a, c, e,** Scatter plots depict the change of viral RNA copies on the log<sub>10</sub> scale over time. Each point represents a sample collected for an individual on a specific date. **b, d, f,** Boxplots present the comparison of viral RNA copies on the log<sub>10</sub> scale by Omicron subvariants. The Kruskal-Wallis p-value indicates the global comparison among the three subvariants. None of the pairwise comparison between two subvariants is significant at the level of 0.05. The *n* indicates the number of samples included in each boxplot. **a, b,** Fine EBA ( $\leq 5 \mu\text{m}$  in diameter); **c, d,** Coarse EBA ( $>5 \mu\text{m}$  in diameter); **e, f,** Total EBA (fine and coarse combined).

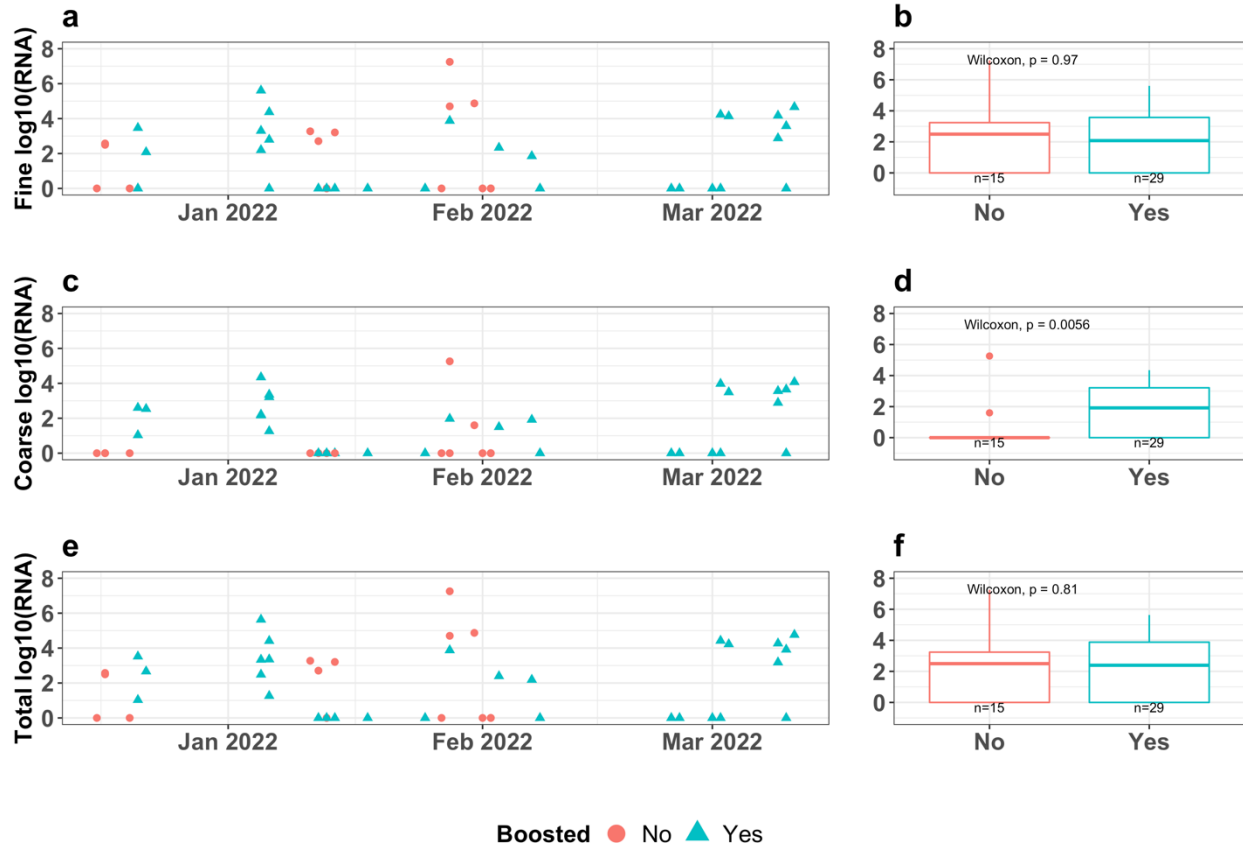

**Extended Data Figure 3. Viral RNA load in exhaled breath aerosol samples by booster status for Omicron cases, December 16, 2021 – March 11, 2022.**

**a, c, e**, Scatter plots depict the change of viral RNA copies on the log<sub>10</sub> scale over time. Each point represents a sample collected for an individual on a specific date. **b, d, f**, Boxplots present the comparison of viral RNA copies on the log<sub>10</sub> scale by booster status. The  $n$  indicates the number of samples included in each boxplot. **a, b**, Fine EBA ( $\leq 5 \mu\text{m}$  in diameter); **c, d**, Coarse EBA ( $>5 \mu\text{m}$  in diameter); **e, f**, Total EBA (fine and coarse combined).

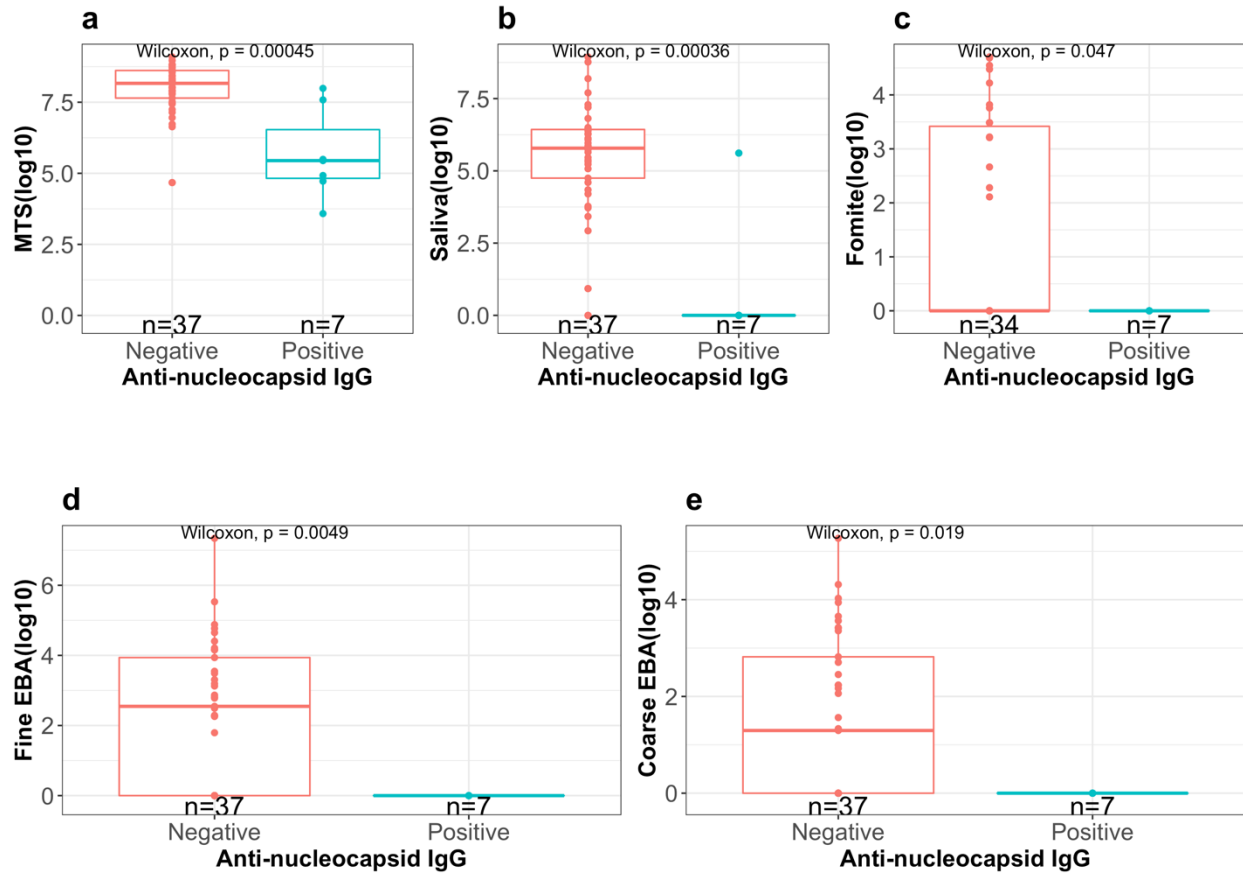

**Extended Data Figure 4. Viral RNA copies (log<sub>10</sub> scale) by status of anti-nucleocapsid IgG for Omicron cases, December 16, 2021 – March 11.**

Boxplots present the comparison of viral RNA copies on the log<sub>10</sub> scale by the status of anti-nucleocapsid IgG at baseline for 29 Omicron cases (24 negative, 5 positive). The *n* indicates the number of samples included in each boxplot. **a**, Mid-turbinate swab (MTS); **b**, Saliva; **c**, Fomite (swab of participant’s mobile phone); **d** and **e**, *Fine* ( $\leq 5 \mu\text{m}$  in diameter) and *Coarse* ( $>5 \mu\text{m}$  in diameter) exhaled breath aerosol (EBA) from 30-minute sampling events. The *n* at the bottom of the plots indicates the number of samples.



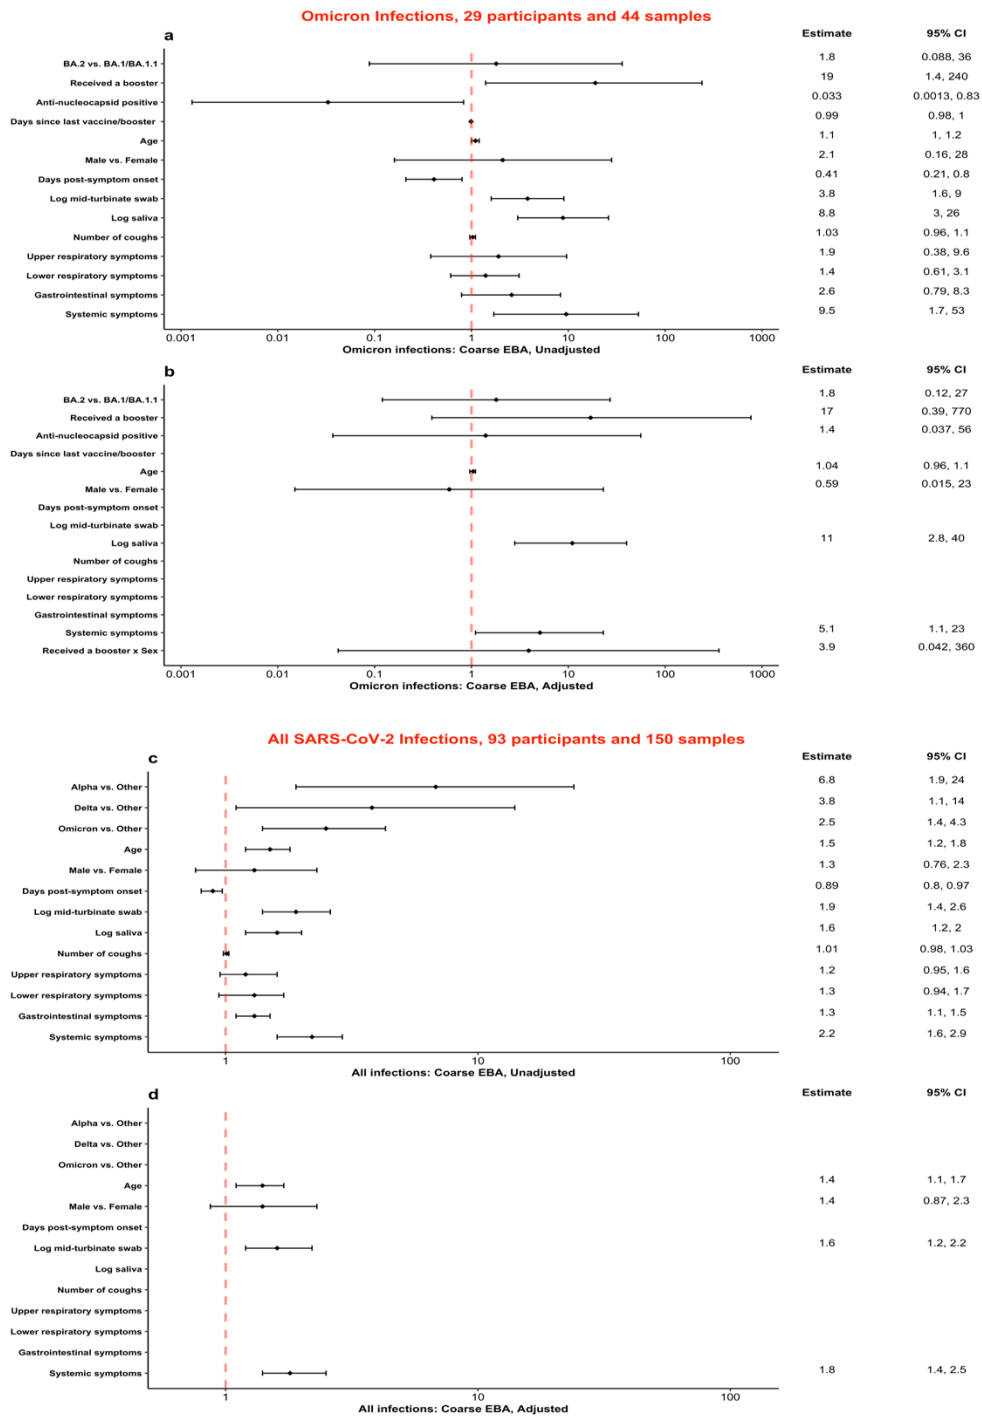

**Extended Data Figure 5. Predictors for SARS-CoV-2 RNA loads in *coarse* exhaled breath aerosol.**

**a-b**, Predictors for viral RNA loads in *coarse* exhaled breath aerosol among 29 participants with Omicron infections enrolled from December 16, 2021 to March 11, 2022. **c-d**, Predictors of viral RNA loads in *coarse* exhaled breath aerosol over the course of the pandemic from June 6, 2020 to March 11, 2022.

Effect estimates and their 95% confidence intervals from linear mixed effect models (observations censored by the limit of detection coded as 1) are shown as the ratio of RNA copy number of samples: variant to variants other than Alpha/Delta/Omicron, Omicron BA.2 to Omicron BA.1 and BA.1.1, received to not received a booster, anti-nucleocapsid positive to negative, male to female, or as the fold-increase in RNA copy number for a 10-year increase in age, 1-day increase in day post-symptom onset or days since last vaccine/booster, 1-count increase in numbers of coughs, and an interquartile range change in symptom scores, mid-turbinate swab and saliva RNA copy number.

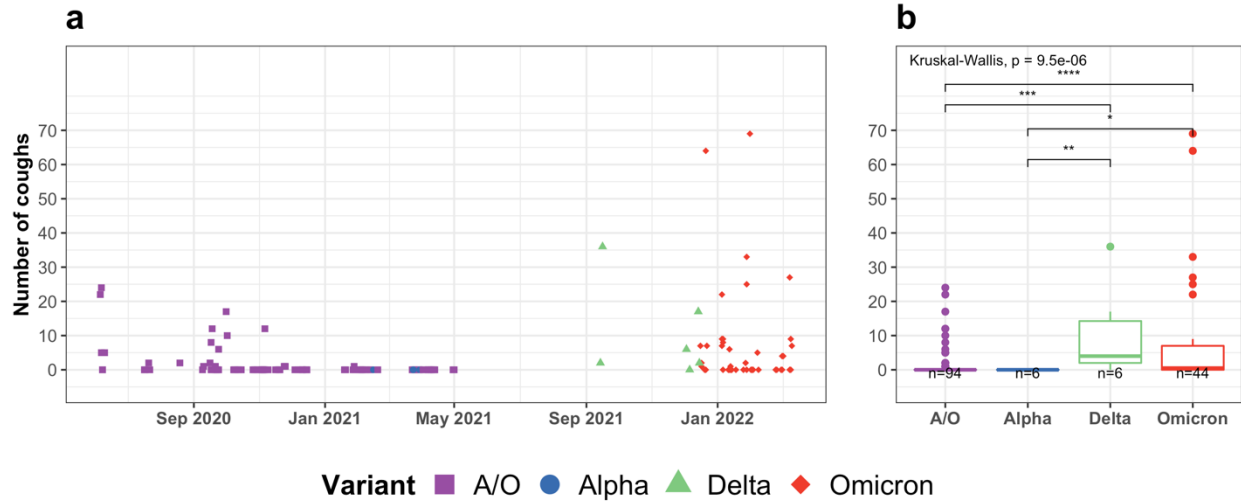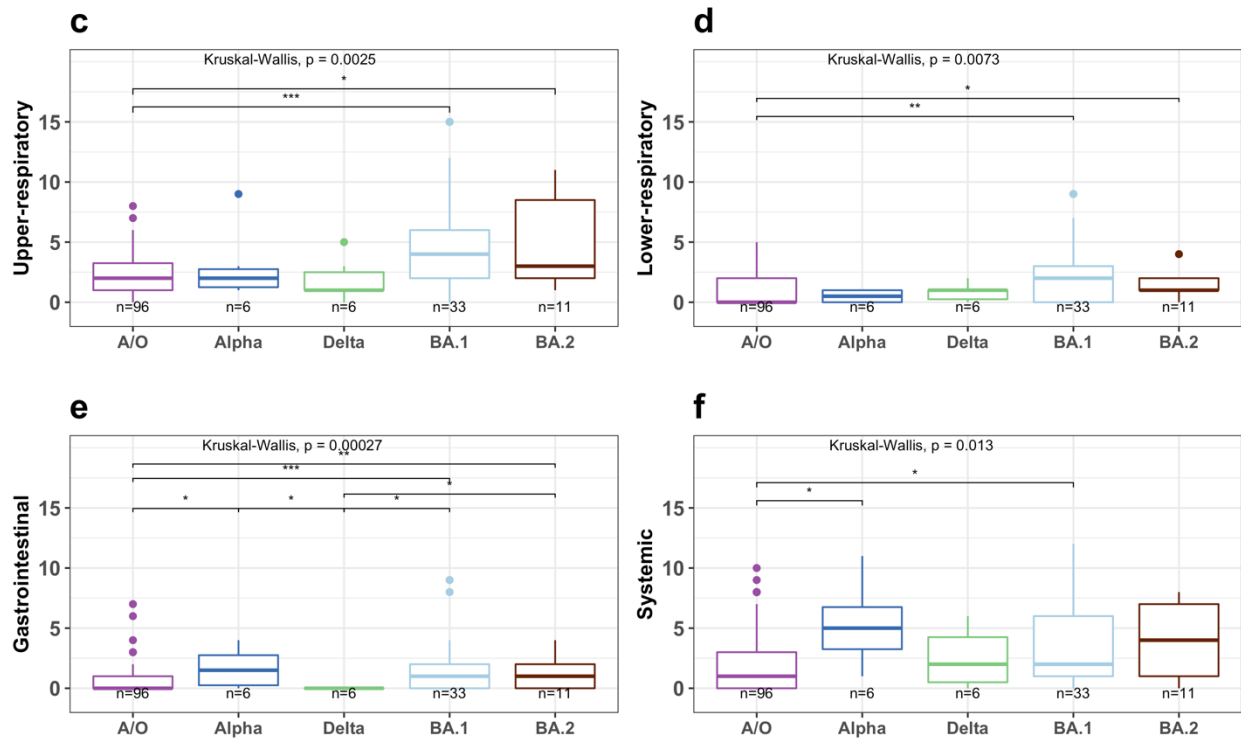

**Extended Data Figure 6. Number of coughs per 30-minute sampling and composite symptom scores for SARS-CoV-2 variants over time, June 6, 2020 – March 11, 2022.**

**a**, Each point in the scatter plot represents a sample collected for an individual on a specific date. **b**, The boxplots present the comparison of number of coughs per 30-minute sampling session by SARS-CoV-2

variants. **c - f**, The boxplots present the comparison of four composite symptom scores by SARS-CoV-2 variants/subvariants. The Kruskal-Wallis p-value indicates the global comparison among the four (**a-b**) or five (**c - f**) variants/subvariants. The asterisks indicate the pairwise comparison. Only those with a p-value less than 0.05 are shown (\*:  $p \leq 0.05$ ; \*\*:  $p \leq 0.01$ ; \*\*\*:  $p \leq 0.001$ ; \*\*\*\*:  $p \leq 0.0001$ ). The  $n$  indicates the number of samples included in each boxplot. *A/O* means SARS-CoV-2 ancestral strains and other variants not associated with increased transmissibility.

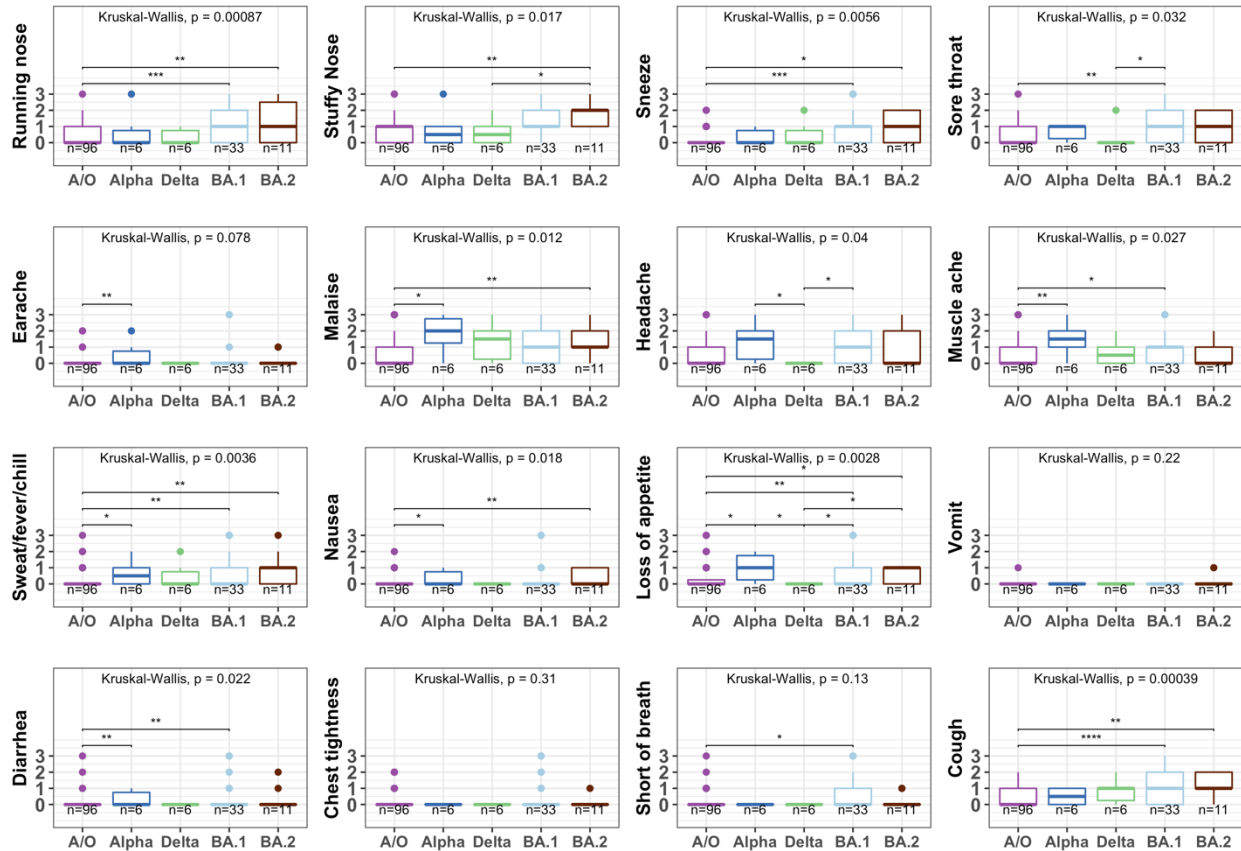

**Extended Data Figure 7. Self-reported symptoms for SARS-CoV-2 variants over time, June 6, 2020 – March 11, 2022.**

The boxplots present the comparison of 16 self-reported symptoms (on a scale of zero to three) by SARS-CoV-2 variants/subvariants. The Kruskal-Wallis p-value indicates the global comparison among the five variants/subvariants. The asterisks indicate the pairwise comparison. Only those with a p-value less than 0.05 are shown (\*:  $p \leq 0.05$ ; \*\*:  $p \leq 0.01$ ; \*\*\*:  $p \leq 0.001$ ; \*\*\*\*:  $p \leq 0.0001$ ). The  $n$  indicates the number of samples included in each boxplot. A/O means SARS-CoV-2 ancestral strains and other variants not associated with increased transmissibility.
